# Supplementary material for: Identification of Natural Compounds against Neurodegenerative Diseases Using In Silico Techniques
Source: PubMed Central journal article supplement (PMC6222649; doi:10.3390/molecules23081847), 2018-07-25
Supplement: molecules-23-01847-s001.pdf [file molecules-23-01847-s001.pdf]

## Supplementary Material

**Table S1.** LRRK2 data set . Predicted and experimental LogIC<sub>50</sub> values for ANN and BMLR model

| ChEMBL ID     | ANN-Pred_LogIC50[nM] | BMLR-Pred_LogIC50[nM] | Exp_LogIC50[nM] |
|---------------|----------------------|-----------------------|-----------------|
| CHEMBL2333112 | 2.256                | 1.640                 | 1.204           |
| CHEMBL2333114 | 1.685                | 1.766                 | 1.820           |
| CHEMBL2333116 | 1.728                | 1.741                 | 1.255           |
| CHEMBL2333117 | 3.768                | 2.288                 | 2.628           |
| CHEMBL2333119 | 1.917                | 1.763                 | 1.771           |
| CHEMBL2333120 | 1.594                | 1.852                 | 1.079           |
| CHEMBL2333121 | 1.401                | 1.029                 | 1.301           |
| CHEMBL2333122 | 1.926                | 1.807                 | 2.621           |
| CHEMBL2333124 | 2.708                | 3.027                 | 3.400           |
| CHEMBL2333126 | 1.523                | 1.586                 | 1.431           |
| CHEMBL2333128 | 1.625                | 1.510                 | 0.845           |
| CHEMBL2333129 | 1.446                | 1.577                 | 1.279           |
| CHEMBL2333130 | 1.478                | 1.704                 | 1.431           |
| CHEMBL2333131 | 1.795                | 1.509                 | 1.740           |
| CHEMBL2333132 | 1.546                | 1.731                 | 1.505           |
| CHEMBL2333133 | 1.746                | 1.715                 | 1.716           |
| CHEMBL2333134 | 1.512                | 1.561                 | 1.724           |
| CHEMBL2333135 | 1.824                | 1.748                 | 1.748           |
| CHEMBL2333138 | 1.827                | 1.669                 | 2.210           |
| CHEMBL2333139 | 1.711                | 2.498                 | 2.422           |
| CHEMBL2347804 | 1.519                | 1.208                 | 1.279           |
| CHEMBL2347805 | 1.361                | 1.305                 | 1.447           |
| CHEMBL2347806 | 1.393                | 1.142                 | 1.681           |
| CHEMBL2347807 | 1.443                | 1.295                 | 1.813           |
| CHEMBL2347808 | 2.569                | 2.206                 | 2.459           |
| CHEMBL2347810 | 1.347                | 1.369                 | 1.146           |
| CHEMBL2347811 | 1.497                | 1.867                 | 1.431           |
| CHEMBL2347812 | 1.688                | 1.933                 | 1.771           |
| CHEMBL2347813 | 2.170                | 1.889                 | 2.079           |
| CHEMBL2347814 | 2.250                | 1.965                 | 2.444           |

Table S1. Cont.

---

|               |       |       |       |
|---------------|-------|-------|-------|
| CHEMBL2347817 | 1.447 | 1.410 | 1.591 |
| CHEMBL2347818 | 1.335 | 1.693 | 1.431 |
| CHEMBL2347819 | 1.958 | 1.944 | 1.851 |
| CHEMBL2347820 | 3.847 | 2.979 | 3.461 |
| CHEMBL2347822 | 3.389 | 2.980 | 3.348 |
| CHEMBL2347823 | 1.367 | 1.435 | 1.447 |
| CHEMBL2347826 | 1.499 | 1.423 | 1.000 |
| CHEMBL2347827 | 1.486 | 1.990 | 1.204 |
| CHEMBL2348937 | 2.376 | 2.321 | 2.301 |
| CHEMBL2348939 | 2.321 | 1.889 | 1.672 |
| CHEMBL2348941 | 3.006 | 2.612 | 3.118 |
| CHEMBL2348943 | 1.163 | 1.524 | 1.000 |
| CHEMBL2348945 | 1.828 | 1.824 | 1.255 |
| CHEMBL2348946 | 2.772 | 1.966 | 1.398 |
| CHEMBL2348947 | 1.533 | 1.887 | 1.544 |
| CHEMBL2348948 | 2.352 | 2.155 | 2.127 |
| CHEMBL2348950 | 2.321 | 2.148 | 1.806 |
| CHEMBL2348951 | 2.181 | 2.885 | 2.403 |
| CHEMBL2348952 | 3.072 | 2.290 | 3.010 |
| CHEMBL2348953 | 2.228 | 1.922 | 1.708 |
| CHEMBL2348955 | 2.463 | 2.188 | 2.253 |
| CHEMBL2348956 | 3.770 | 2.533 | 2.490 |
| CHEMBL2348957 | 3.489 | 3.294 | 3.305 |
| CHEMBL2348960 | 2.618 | 2.750 | 3.307 |
| CHEMBL2348964 | 1.742 | 1.599 | 1.886 |
| CHEMBL2348967 | 1.856 | 1.244 | 1.826 |
| CHEMBL2348968 | 2.037 | 2.634 | 2.004 |
| CHEMBL2348969 | 1.576 | 1.406 | 1.519 |
| CHEMBL2348970 | 2.010 | 2.704 | 2.149 |
| CHEMBL2348971 | 2.065 | 2.327 | 1.681 |
| CHEMBL2348972 | 2.092 | 1.769 | 2.332 |
| CHEMBL2348973 | 2.230 | 2.323 | 2.272 |
| CHEMBL2348974 | 2.517 | 1.788 | 2.223 |
| CHEMBL2348975 | 2.835 | 2.305 | 2.764 |
| CHEMBL2348978 | 3.131 | 2.338 | 2.902 |
| CHEMBL2348983 | 2.932 | 2.851 | 3.192 |
| CHEMBL2349092 | 2.490 | 2.725 | 3.356 |
| CHEMBL3326114 | 2.633 | 2.836 | 2.238 |
| CHEMBL3326115 | 2.882 | 2.599 | 2.695 |
| CHEMBL3326116 | 2.782 | 2.368 | 2.384 |
| CHEMBL3326117 | 2.573 | 2.875 | 2.543 |
| CHEMBL3326118 | 2.983 | 2.707 | 2.944 |
| CHEMBL3326119 | 2.150 | 2.151 | 1.820 |

---

**Table S1. Cont.**

|               |       |       |       |
|---------------|-------|-------|-------|
| CHEMBL3326120 | 3.530 | 3.129 | 3.360 |
| CHEMBL3326124 | 3.080 | 2.227 | 2.905 |
| CHEMBL3326125 | 1.653 | 2.471 | 1.959 |
| CHEMBL3326126 | 1.912 | 2.355 | 1.978 |
| CHEMBL3326127 | 2.232 | 2.730 | 2.350 |
| CHEMBL3326128 | 2.678 | 2.300 | 1.806 |
| CHEMBL3326129 | 2.736 | 2.418 | 2.509 |
| CHEMBL3326130 | 2.848 | 3.229 | 3.029 |
| CHEMBL3326131 | 3.348 | 2.811 | 3.324 |
| CHEMBL3326132 | 1.482 | 1.905 | 1.806 |
| CHEMBL3326134 | 2.824 | 2.637 | 2.572 |
| CHEMBL3326135 | 3.594 | 2.419 | 3.130 |
| CHEMBL3326137 | 2.748 | 2.768 | 2.373 |
| CHEMBL3326138 | 3.177 | 2.711 | 2.740 |
| CHEMBL3326139 | 4.025 | 3.822 | 3.793 |
| CHEMBL3326140 | 4.258 | 3.817 | 3.960 |
| CHEMBL3326145 | 3.751 | 4.208 | 4.505 |
| CHEMBL3326146 | 2.871 | 2.925 | 3.165 |
| CHEMBL3326149 | 2.750 | 2.745 | 2.720 |
| CHEMBL3326150 | 4.096 | 3.539 | 2.820 |
| CHEMBL3326151 | 3.131 | 3.109 | 3.059 |
| CHEMBL3393443 | 1.445 | 1.713 | 1.255 |
| CHEMBL3393445 | 1.721 | 1.865 | 1.623 |
| CHEMBL3393447 | 1.636 | 1.380 | 1.568 |
| CHEMBL3393448 | 2.125 | 1.691 | 1.301 |
| CHEMBL3393450 | 2.141 | 1.826 | 2.310 |
| CHEMBL3393451 | 1.436 | 1.640 | 2.045 |
| CHEMBL3393453 | 1.791 | 1.674 | 2.143 |

**Table S2.** NMDA data set. Predicted and experimental LogIC<sub>50</sub> values for ANN and BMLR model

| ChEMBL ID    | ANN-Pred_LogIC50[nM] | BMLR-Pred_LogIC50[nM] | Exp_LogIC50[nM] |
|--------------|----------------------|-----------------------|-----------------|
| CHEMBL12242  | -0.039               | 0.281                 | 0.079           |
| CHEMBL12256  | 1.264                |                       | 0.869           |
| CHEMBL12301  | 1.034                |                       | 2.079           |
| CHEMBL12414  | 0.837                | 1.203                 | 1.431           |
| CHEMBL12513  | 0.655                | 0.315                 | -0.097          |
| CHEMBL12546  | 2.250                | 1.809                 | 2.114           |
| CHEMBL126228 | 1.220                | 1.982                 | 1.491           |
| CHEMBL12706  | 3.073                | 2.747                 | 2.398           |
| CHEMBL12728  | 2.447                |                       | 3.041           |
| CHEMBL12733  | 1.194                |                       | 2.204           |
| CHEMBL12804  | 0.679                |                       | 0.000           |

Table S2. *Cont.*

---

|              |        |        |       |
|--------------|--------|--------|-------|
| CHEMBL141985 | 3.088  | 3.364  | 3.204 |
| CHEMBL145074 | 3.562  | 3.401  | 3.498 |
| CHEMBL145362 | 3.172  | 3.467  | 3.223 |
| CHEMBL145406 | 2.823  | 3.377  | 2.893 |
| CHEMBL145728 | 2.915  | 3.235  | 2.836 |
| CHEMBL146168 | 3.629  | 3.309  | 2.966 |
| CHEMBL173031 | 2.736  |        | 2.029 |
| CHEMBL17350  | 0.965  |        | 0.845 |
| CHEMBL182066 | 1.430  |        | 0.778 |
| CHEMBL182369 | 1.211  | 1.923  | 2.143 |
| CHEMBL182665 | 1.573  | 1.245  | 0.903 |
| CHEMBL182698 | 1.278  | 1.300  | 0.903 |
| CHEMBL182951 | 1.281  | 1.384  | 1.230 |
| CHEMBL183142 | 0.887  | 1.014  | 1.415 |
| CHEMBL183457 | 0.967  | 1.298  | 1.230 |
| CHEMBL183825 | 0.759  | 1.314  | 1.230 |
| CHEMBL185812 | 1.192  | 1.331  | 1.732 |
| CHEMBL21641  | 4.527  | 2.951  | 3.255 |
| CHEMBL219631 | 1.014  | 1.085  | 0.602 |
| CHEMBL22304  | 2.242  | 2.039  | 2.342 |
| CHEMBL22720  | 3.557  | 3.163  | 3.519 |
| CHEMBL268714 | 2.340  |        | 2.568 |
| CHEMBL268920 | 1.107  | 1.522  | 0.987 |
| CHEMBL269683 | 0.289  | 0.221  | 0.230 |
| CHEMBL273636 | 1.015  | 0.632  | 0.903 |
| CHEMBL273662 | 0.468  | -0.076 | 0.176 |
| CHEMBL273686 | 1.035  | 1.616  | 1.491 |
| CHEMBL273889 | 1.869  |        | 2.934 |
| CHEMBL274422 | 0.333  | 0.420  | 0.176 |
| CHEMBL275906 | 0.263  | 0.897  | 0.908 |
| CHEMBL275966 | -0.018 | 0.913  | 1.230 |
| CHEMBL276670 | 1.067  | 1.345  | 1.580 |
| CHEMBL282003 | 2.961  | 2.554  | 2.447 |
| CHEMBL282672 | 3.974  | 3.790  | 3.991 |
| CHEMBL284028 | 3.350  | 2.475  | 2.114 |
| CHEMBL288384 | 3.283  | 2.585  | 2.892 |
| CHEMBL288839 | 2.254  |        | 1.863 |
| CHEMBL288855 | 1.663  |        | 0.845 |
| CHEMBL289167 | 3.643  |        | 3.633 |
| CHEMBL289779 | 3.543  | 3.209  | 2.863 |
| CHEMBL289832 | 2.722  |        | 0.771 |
| CHEMBL290747 | 1.749  | 3.705  | 3.447 |
| CHEMBL291148 | 2.719  | 2.214  | 1.978 |

---

Table S2. *Cont.*

---

|              |       |       |       |
|--------------|-------|-------|-------|
| CHEMBL291149 | 1.931 | 1.700 | 1.914 |
| CHEMBL291161 | 2.371 | 2.362 | 2.342 |
| CHEMBL291169 | 2.200 |       | 2.959 |
| CHEMBL291170 | 2.949 |       | 3.519 |
| CHEMBL295084 | 3.852 | 3.912 | 3.519 |
| CHEMBL295154 | 3.188 |       | 1.724 |
| CHEMBL295178 | 3.976 | 3.032 | 3.176 |
| CHEMBL295995 | 2.406 | 2.126 | 2.176 |
| CHEMBL296068 | 2.779 | 3.333 | 3.322 |
| CHEMBL296521 | 2.420 |       | 3.491 |
| CHEMBL297310 | 2.538 | 3.624 | 3.462 |
| CHEMBL297881 | 2.319 |       | 0.672 |
| CHEMBL298284 | 3.258 |       | 3.968 |
| CHEMBL302783 | 2.324 | 2.192 | 2.664 |
| CHEMBL305195 | 0.848 |       | 0.778 |
| CHEMBL317229 | 1.187 |       | 0.602 |
| CHEMBL357426 | 3.090 | 3.087 | 2.806 |
| CHEMBL360373 | 1.505 |       | 1.204 |
| CHEMBL360463 | 2.045 | 1.826 | 2.117 |
| CHEMBL363010 | 0.795 | 1.327 | 0.602 |
| CHEMBL363722 | 1.323 | 1.040 | 0.699 |
| CHEMBL367816 | 1.510 | 1.025 | 1.602 |
| CHEMBL39664  | 1.937 | 1.666 | 1.732 |
| CHEMBL40623  | 2.107 |       | 1.079 |
| CHEMBL40649  | 3.203 | 2.454 | 3.279 |
| CHEMBL40652  | 2.165 |       | 1.462 |
| CHEMBL40708  | 2.298 | 2.525 | 2.230 |
| CHEMBL40745  | 2.448 | 1.978 | 2.114 |
| CHEMBL40755  | 4.488 | 4.033 | 4.301 |
| CHEMBL40976  | 1.804 |       | 1.362 |
| CHEMBL41180  | 3.587 | 3.405 | 3.477 |
| CHEMBL41291  | 2.277 |       | 2.041 |
| CHEMBL41295  | 2.307 | 2.729 | 2.204 |
| CHEMBL41340  | 2.819 | 2.820 | 2.462 |
| CHEMBL41341  | 2.409 | 2.225 | 2.602 |
| CHEMBL41399  | 2.092 |       | 2.806 |
| CHEMBL41460  | 2.460 |       | 1.462 |
| CHEMBL41501  | 4.261 | 3.967 | 3.732 |
| CHEMBL41691  | 2.638 | 1.858 | 1.653 |
| CHEMBL417710 | 3.963 | 3.407 | 4.114 |
| CHEMBL41791  | 4.065 |       | 3.991 |
| CHEMBL41939  | 4.131 |       | 4.279 |
| CHEMBL42057  | 3.208 |       | 3.643 |

---

Table S2. *Cont.*

---

|              |        |       |       |
|--------------|--------|-------|-------|
| CHEMBL42071  | 3.477  | 3.625 | 3.146 |
| CHEMBL42146  | 2.316  |       | 1.568 |
| CHEMBL42176  | 1.890  | 1.720 | 2.342 |
| CHEMBL42248  | 1.933  | 1.923 | 1.806 |
| CHEMBL42307  | 1.480  |       | 3.602 |
| CHEMBL42329  | 3.256  | 2.505 | 2.799 |
| CHEMBL42350  | 3.301  |       | 3.176 |
| CHEMBL42367  | 3.416  |       | 4.230 |
| CHEMBL42426  | 2.201  |       | 0.940 |
| CHEMBL42430  | 3.645  | 3.795 | 4.230 |
| CHEMBL42466  | 2.416  | 2.175 | 2.176 |
| CHEMBL42482  | 4.471  | 2.737 | 3.146 |
| CHEMBL42694  | 3.345  | 3.435 | 3.255 |
| CHEMBL42805  | 2.865  | 3.167 | 3.869 |
| CHEMBL42915  | 1.840  |       | 1.519 |
| CHEMBL43122  | 2.321  |       | 3.633 |
| CHEMBL43318  | 3.086  |       | 3.531 |
| CHEMBL43800  | 4.494  |       | 4.380 |
| CHEMBL43846  | 2.138  |       | 1.477 |
| CHEMBL43848  | 2.638  |       | 4.041 |
| CHEMBL43869  | 4.570  | 3.936 | 4.204 |
| CHEMBL44018  | 2.591  |       | 3.556 |
| CHEMBL442545 | 3.491  |       | 4.176 |
| CHEMBL44260  | 3.630  | 3.425 | 3.255 |
| CHEMBL536106 | 0.519  |       | 1.903 |
| CHEMBL536107 | 1.362  |       | 0.301 |
| CHEMBL537478 | -0.339 |       | 0.176 |
| CHEMBL541604 | 3.504  | 3.374 | 3.023 |
| CHEMBL543252 | 2.358  | 1.685 | 1.813 |
| CHEMBL543489 | 0.964  |       | 1.778 |
| CHEMBL543722 | 2.922  | 1.745 | 1.602 |
| CHEMBL544390 | 4.180  | 3.632 | 4.001 |
| CHEMBL552664 | 0.502  | 0.712 | 0.477 |
| CHEMBL553334 | 2.779  | 2.698 | 3.000 |
| CHEMBL557993 | 1.716  |       | 0.613 |
| CHEMBL84612  | 2.353  | 2.155 | 2.248 |

---

**Table S3.** TrkA data set. Predicted and experimental LogIC<sub>50</sub> values for ANN and BMLR model

| ChEMBL ID     | ANN-Pred_LogIC50[nM] | BMLR-Pred_LogIC50[nM] | Exp_LogIC50[nM] |
|---------------|----------------------|-----------------------|-----------------|
| CHEMBL3671129 | 0.067                | 0.044                 | -0.155          |
| CHEMBL3671130 | -0.075               | 0.271                 | -0.155          |
| CHEMBL3671131 | -0.197               | 0.194                 | 0.362           |
| CHEMBL3671132 | 0.060                | 0.081                 | -0.022          |
| CHEMBL3671133 | 0.160                | -0.007                | -0.022          |
| CHEMBL3671134 | 0.159                | 0.299                 | 0.190           |
| CHEMBL3671135 | 0.134                | 0.001                 | -0.347          |
| CHEMBL3671137 | 0.342                | 0.624                 | 0.538           |
| CHEMBL3671138 | -0.087               | 0.092                 | 0.021           |
| CHEMBL3671141 | -0.193               | 0.018                 | -0.301          |
| CHEMBL3671142 | 0.079                | 0.063                 | -0.260          |
| CHEMBL3671144 | -0.030               | 0.162                 | -0.046          |
| CHEMBL3671145 | 0.040                | 0.308                 | 0.332           |
| CHEMBL3671146 | 1.410                | 1.593                 | 1.583           |
| CHEMBL3671147 | 1.729                | 1.860                 | 1.871           |
| CHEMBL3671148 | -0.047               | 0.044                 | -0.222          |
| CHEMBL3671149 | 0.541                | 0.479                 | 0.470           |
| CHEMBL3671150 | 0.208                | 0.343                 | 0.322           |
| CHEMBL3671152 | 0.639                | 0.593                 | 0.556           |
| CHEMBL3671154 | -0.090               | 0.301                 | 0.114           |
| CHEMBL3671156 | 0.317                | 0.562                 | 0.447           |
| CHEMBL3671157 | 0.101                | 0.172                 | 0.114           |
| CHEMBL3675908 | 0.022                | 0.173                 | 0.290           |
| CHEMBL3675914 | 0.061                | 0.643                 | 0.322           |
| CHEMBL3675915 | -0.134               | 0.737                 | 0.217           |
| CHEMBL3675918 | -0.015               | 0.138                 | -0.097          |
| CHEMBL3675922 | 0.344                | 0.121                 | 0.176           |
| CHEMBL3675923 | -0.023               | 0.287                 | 0.146           |
| CHEMBL3675924 | 0.248                | 0.270                 | 0.519           |
| CHEMBL3675925 | 0.015                | -0.067                | 0.176           |
| CHEMBL3675928 | 0.177                | 0.011                 | 0.072           |
| CHEMBL3675929 | 0.863                | 0.921                 | 0.869           |
| CHEMBL3675930 | 0.782                | 1.039                 | 1.017           |
| CHEMBL3675931 | 0.036                | 0.626                 | 0.352           |
| CHEMBL3675932 | 0.109                | 0.964                 | 0.380           |
| CHEMBL3675933 | 0.238                | 0.618                 | 0.594           |
| CHEMBL3675934 | -0.001               | 0.664                 | 0.973           |
| CHEMBL3675936 | 0.178                | 0.481                 | 0.352           |
| CHEMBL3675937 | 0.014                | 0.251                 | 0.290           |
| CHEMBL3675938 | 0.050                | 0.236                 | 0.403           |
| CHEMBL3675939 | -0.088               | 0.104                 | 0.658           |
| CHEMBL3675940 | -0.093               | 0.006                 | 0.204           |

Table S3. *Cont.*

---

|               |        |       |        |
|---------------|--------|-------|--------|
| CHEMBL3675941 | -0.166 | 0.045 | -0.222 |
| CHEMBL3675942 | 0.056  | 0.037 | -0.244 |
| CHEMBL3675943 | 0.312  | 0.254 | 0.708  |
| CHEMBL3675944 | 0.903  | 2.090 | 1.780  |
| CHEMBL3675945 | 0.490  | 1.131 | 1.379  |
| CHEMBL3675946 | 0.627  | 1.045 | 0.937  |
| CHEMBL3675949 | 0.522  | 0.942 | 1.100  |
| CHEMBL3675950 | -0.100 | 0.663 | 0.842  |
| CHEMBL3675952 | 0.245  | 0.647 | 0.730  |
| CHEMBL3675959 | 0.113  | 0.979 | 1.323  |
| CHEMBL3675960 | 0.338  | 0.674 | 0.972  |
| CHEMBL3675962 | 0.431  | 0.814 | 1.207  |
| CHEMBL3675964 | 0.036  | 0.707 | 0.556  |
| CHEMBL3675967 | 2.404  | 2.730 | 3.006  |
| CHEMBL3675968 | 0.771  | 1.030 | 0.708  |
| CHEMBL3675969 | 2.797  | 2.864 | 2.755  |
| CHEMBL3675970 | 0.907  | 0.768 | 0.732  |
| CHEMBL3675971 | 2.431  | 2.928 | 2.535  |
| CHEMBL3675972 | 0.678  | 0.693 | 0.792  |
| CHEMBL3675973 | 0.684  | 0.884 | 0.954  |
| CHEMBL3675974 | 0.902  | 1.039 | 0.845  |
| CHEMBL3675975 | 0.895  | 1.040 | 1.068  |
| CHEMBL3675977 | 1.211  | 1.601 | 1.943  |
| CHEMBL3675978 | 0.984  | 1.651 | 1.920  |
| CHEMBL3675979 | 1.158  | 0.876 | 1.405  |
| CHEMBL3675980 | 0.942  | 1.135 | 0.886  |
| CHEMBL3675981 | 1.011  | 0.905 | 1.215  |
| CHEMBL3675982 | 2.839  | 3.009 | 3.076  |
| CHEMBL3675984 | 1.058  | 1.242 | 1.571  |
| CHEMBL3675985 | 1.043  | 1.354 | 1.577  |
| CHEMBL3675986 | 1.295  | 1.115 | 1.490  |
| CHEMBL3675987 | 0.479  | 0.835 | 0.505  |
| CHEMBL3675988 | 1.138  | 1.067 | 1.476  |
| CHEMBL3675989 | 1.262  | 1.079 | 1.185  |
| CHEMBL3675990 | 1.104  | 1.016 | 1.418  |
| CHEMBL3675991 | 1.059  | 1.251 | 1.653  |
| CHEMBL3675992 | 0.809  | 1.391 | 1.352  |
| CHEMBL3675994 | 1.216  | 1.635 | 1.358  |
| CHEMBL3675996 | 0.664  | 1.146 | 1.521  |
| CHEMBL3675997 | 0.608  | 0.760 | 0.806  |
| CHEMBL3675999 | 1.215  | 1.241 | 1.107  |
| CHEMBL3676000 | 2.496  | 2.420 | 2.339  |
| CHEMBL3676001 | 2.897  | 2.558 | 2.672  |

---



Table S3. *Cont.*

---

|               |        |       |        |
|---------------|--------|-------|--------|
| CHEMBL3676003 | 0.698  | 1.181 | 0.903  |
| CHEMBL3676005 | 0.719  | 0.979 | 0.699  |
| CHEMBL3676006 | 1.121  | 1.377 | 1.647  |
| CHEMBL3676007 | 1.157  | 1.480 | 1.204  |
| CHEMBL3676008 | 0.951  | 0.937 | 0.869  |
| CHEMBL3676010 | 0.646  | 1.553 | 1.420  |
| CHEMBL3676011 | 2.712  | 2.672 | 2.900  |
| CHEMBL3676012 | 0.815  | 1.174 | 1.542  |
| CHEMBL3676015 | 0.911  | 1.039 | 0.973  |
| CHEMBL3676016 | 1.221  | 1.119 | 1.104  |
| CHEMBL3676017 | 0.847  | 0.888 | 0.903  |
| CHEMBL3676020 | 0.638  | 0.953 | 0.785  |
| CHEMBL3676021 | 0.685  | 0.883 | 0.756  |
| CHEMBL3676023 | 1.165  | 0.965 | 1.258  |
| CHEMBL3676024 | 0.701  | 0.824 | 0.322  |
| CHEMBL3676029 | 0.805  | 1.307 | 0.996  |
| CHEMBL3676030 | 0.484  | 0.889 | 0.633  |
| CHEMBL3676034 | 0.015  | 0.005 | 0.041  |
| CHEMBL3676035 | 0.077  | 0.286 | 0.380  |
| CHEMBL3676036 | 0.031  | 0.175 | 0.342  |
| CHEMBL3676037 | 0.057  | 0.064 | 0.079  |
| CHEMBL3676038 | 0.037  | 0.017 | -0.046 |
| CHEMBL3676040 | 0.118  | 0.307 | 0.672  |
| CHEMBL3676041 | -0.005 | 0.154 | 0.398  |
| CHEMBL3676042 | 0.066  | 0.106 | 0.176  |
| CHEMBL3676045 | 0.163  | 0.113 | 0.255  |
| CHEMBL3676046 | 0.000  | 0.232 | 0.398  |
| CHEMBL3676049 | 1.205  | 1.166 | 1.233  |
| CHEMBL3676050 | 0.426  | 0.846 | 1.053  |
| CHEMBL3676051 | 0.666  | 0.960 | 0.839  |
| CHEMBL3676052 | 0.700  | 0.861 | 0.869  |
| CHEMBL3676053 | 0.843  | 0.981 | 0.934  |
| CHEMBL3676060 | 2.637  | 2.742 | 2.641  |
| CHEMBL3676061 | 1.143  | 1.080 | 1.193  |
| CHEMBL3676062 | 0.720  | 0.987 | 0.886  |
| CHEMBL3676063 | 0.967  | 0.967 | 0.833  |
| CHEMBL3676066 | 0.742  | 1.000 | 0.556  |
| CHEMBL3676067 | 0.688  | 0.860 | 1.104  |
| CHEMBL3676069 | 0.767  | 0.714 | 1.286  |
| CHEMBL3676071 | 0.190  | 0.799 | 1.155  |
| CHEMBL3676072 | 0.304  | 0.720 | 0.591  |
| CHEMBL3676075 | 0.613  | 0.892 | 1.233  |
| CHEMBL3676076 | 0.319  | 0.718 | 0.519  |

---

**Table S3. Cont.**

|               |       |       |       |
|---------------|-------|-------|-------|
| CHEMBL3676077 | 0.209 | 0.791 | 0.623 |
| CHEMBL3676078 | 0.778 | 1.336 | 1.580 |
| CHEMBL3676079 | 1.105 | 1.265 | 0.934 |
| CHEMBL3676080 | 1.130 | 1.226 | 1.185 |
| CHEMBL3676081 | 0.030 | 0.816 | 0.491 |
| CHEMBL3676082 | 0.362 | 0.673 | 0.763 |
| CHEMBL3676086 | 1.481 | 1.760 | 1.693 |
| CHEMBL3676088 | 0.771 | 0.569 | 1.021 |
| CHEMBL3676089 | 0.978 | 0.601 | 1.090 |
| CHEMBL3676090 | 0.823 | 0.684 | 1.114 |
| CHEMBL3676091 | 0.911 | 0.944 | 1.201 |
| CHEMBL3676092 | 0.885 | 0.586 | 0.477 |
| CHEMBL3676093 | 0.823 | 1.198 | 0.940 |
| CHEMBL3676094 | 1.010 | 0.762 | 0.653 |
| CHEMBL3676096 | 0.709 | 1.088 | 1.029 |
| CHEMBL3676097 | 0.568 | 0.708 | 0.447 |
| CHEMBL3676098 | 0.586 | 0.724 | 0.342 |
| CHEMBL3676099 | 0.690 | 0.670 | 0.322 |
| CHEMBL3676100 | 0.644 | 0.572 | 0.279 |
| CHEMBL3676102 | 1.017 | 1.258 | 1.053 |
| CHEMBL3676103 | 1.056 | 1.137 | 1.338 |
| CHEMBL3676104 | 0.797 | 1.137 | 0.949 |
| CHEMBL3676105 | 1.116 | 1.177 | 0.954 |

**Table S4.** Binding free energies (in kcal/mol) of the NMDA–ligand complexes calculated using the MM/GBSA method.

| Energy term               | NMDA     |           |           |           |
|---------------------------|----------|-----------|-----------|-----------|
|                           | GNE-5729 | <u>1N</u> | <u>2N</u> | <u>3N</u> |
| $\Delta E_{H-bnd}$        | -0.33    | -0.80     | -0.28     | -0.25     |
| $\Delta E_{covalent-bnd}$ | 1.52     | 0.94      | -1.33     | 1.76      |
| $\Delta E_{el}$           | -21.94   | -12.16    | -17.25    | -7.22     |
| $\Delta E_{vdW}$          | -65.43   | -52.99    | -52.62    | -49.51    |
| $\Delta E_{\pi-\pi}$      | -1.75    | -5.02     | -0.19     | -0.74     |
| $\Delta G_{pot}$          | 23.21    | 25.77     | 17.88     | 19.06     |
| $\Delta G_{np}$           | -52.52   | -34.24    | -33.28    | -29.50    |
| $\Delta G_{bind}$         | -117.25  | -78.50    | -87.07    | -66.39    |
| Ligand efficiency         | 4.34     | 3.14      | 3.63      | 2.89      |

**Table S5.** Binding free energies (in kcal/mol) of the LRRK2–ligand complexes calculated using the MM/GBSA method.

| Energy term               | LRRK2       |           |           |           |
|---------------------------|-------------|-----------|-----------|-----------|
|                           | PF-06447475 | <u>1L</u> | <u>2L</u> | <u>3L</u> |
| $\Delta E_{H-bnd}$        | -0.97       | -0.38     | -0.78     | -0.23     |
| $\Delta E_{covalent-bnd}$ | 2.11        | 2.17      | 1.95      | 1.34      |
| $\Delta E_{el}$           | -14.22      | -12.78    | -5.62     | -5.13     |
| $\Delta E_{vdW}$          | -43.48      | -54.23    | -40.02    | -43.08    |
| $\Delta E_{\pi-\pi}$      | -1.69       | -5.35     | -0.22     | -0.01     |
| $\Delta G_{pol}$          | 14.74       | 14.51     | 13.65     | 13.73     |
| $\Delta G_{np}$           | -28.91      | -49.33    | -32.37    | -35.74    |
| $\Delta G_{bind}$         | -72.41      | -100.04   | -63.40    | -69.12    |
| Ligand efficiency         | 3.15        | 4.00      | 2.76      | 3.01      |

**Table S6.** Binding free energies (in kcal/mol) of the TrkA–ligand complexes calculated using the MM/GBSA method.

| Energy term               | TrkA   |           |           |           |
|---------------------------|--------|-----------|-----------|-----------|
|                           | AZ-23  | <u>1T</u> | <u>2T</u> | <u>3T</u> |
| $\Delta E_{H-bnd}$        | -0.50  | -0.36     | 0         | -0.26     |
| $\Delta E_{covalent-bnd}$ | 4.51   | 2.59      | 1.34      | 0.88      |
| $\Delta E_{el}$           | -10.80 | -4.65     | -11.97    | -2.21     |
| $\Delta E_{vdW}$          | -45.38 | -26.88    | -26.89    | -46.04    |
| $\Delta E_{\pi-\pi}$      | -0.16  | 0         | -0.09     | -0.13     |
| $\Delta G_{pol}$          | 16.86  | 16.58     | 23.39     | 17.15     |
| $\Delta G_{np}$           | -34.96 | -23.42    | -28.77    | -39.19    |
| $\Delta G_{bind}$         | -70.44 | -36.13    | -43.01    | -69.81    |
| Ligand efficiency         | 2.61   | 1.39      | 2.69      | 2.79      |

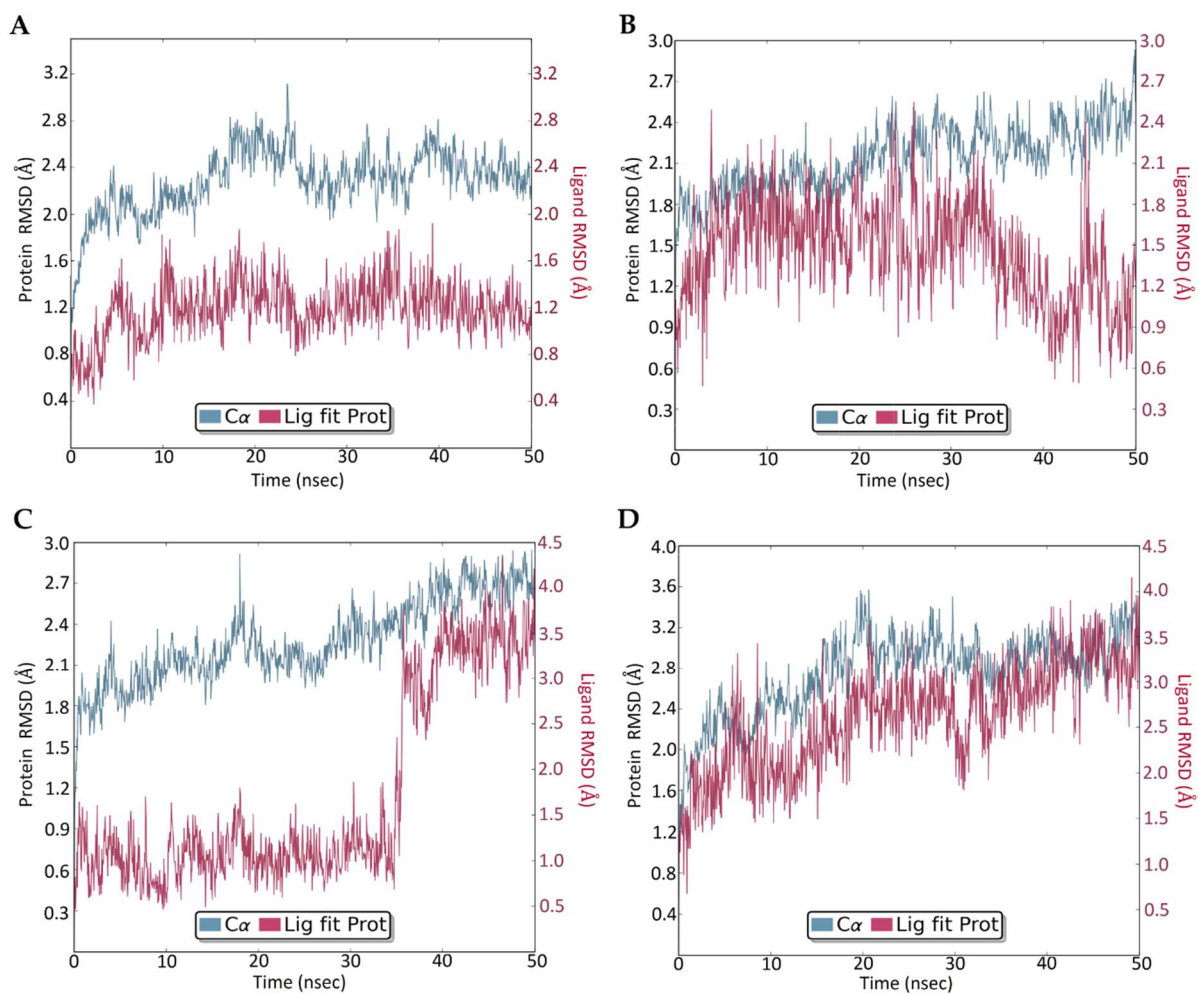

**Figure S1.** RMSD of the atomic positions for the compounds GNE-5729 (A), 1N (B), 2N (C) and 3N (D) (in red) and the receptor NMDA (in blue) of the 50 ns molecular dynamics simulations using Desmond code.

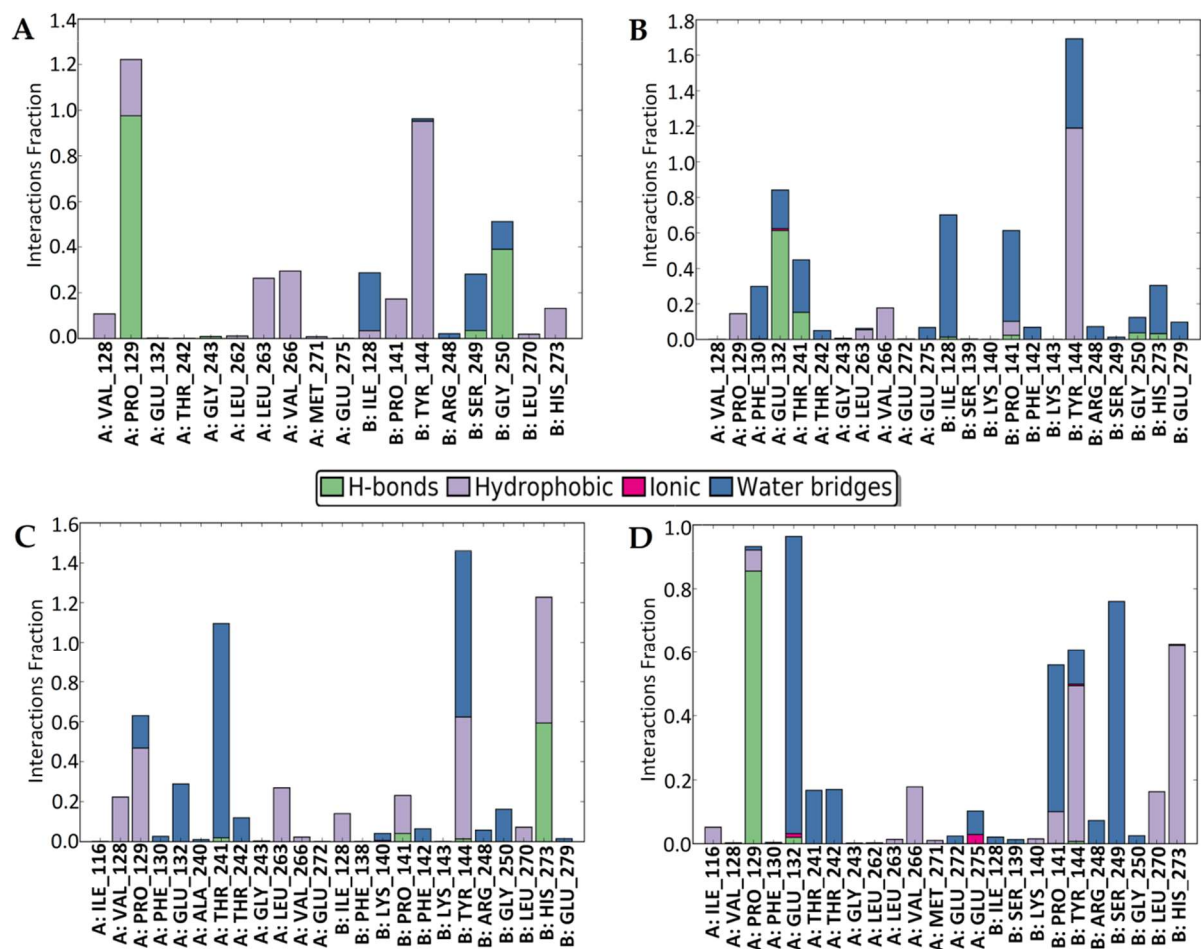

**Figure S2.** Molecular dynamics calculated contacts between compounds GNE-5729 (A), 1N (B), 2N (C) and 3N (D) and NMDA.

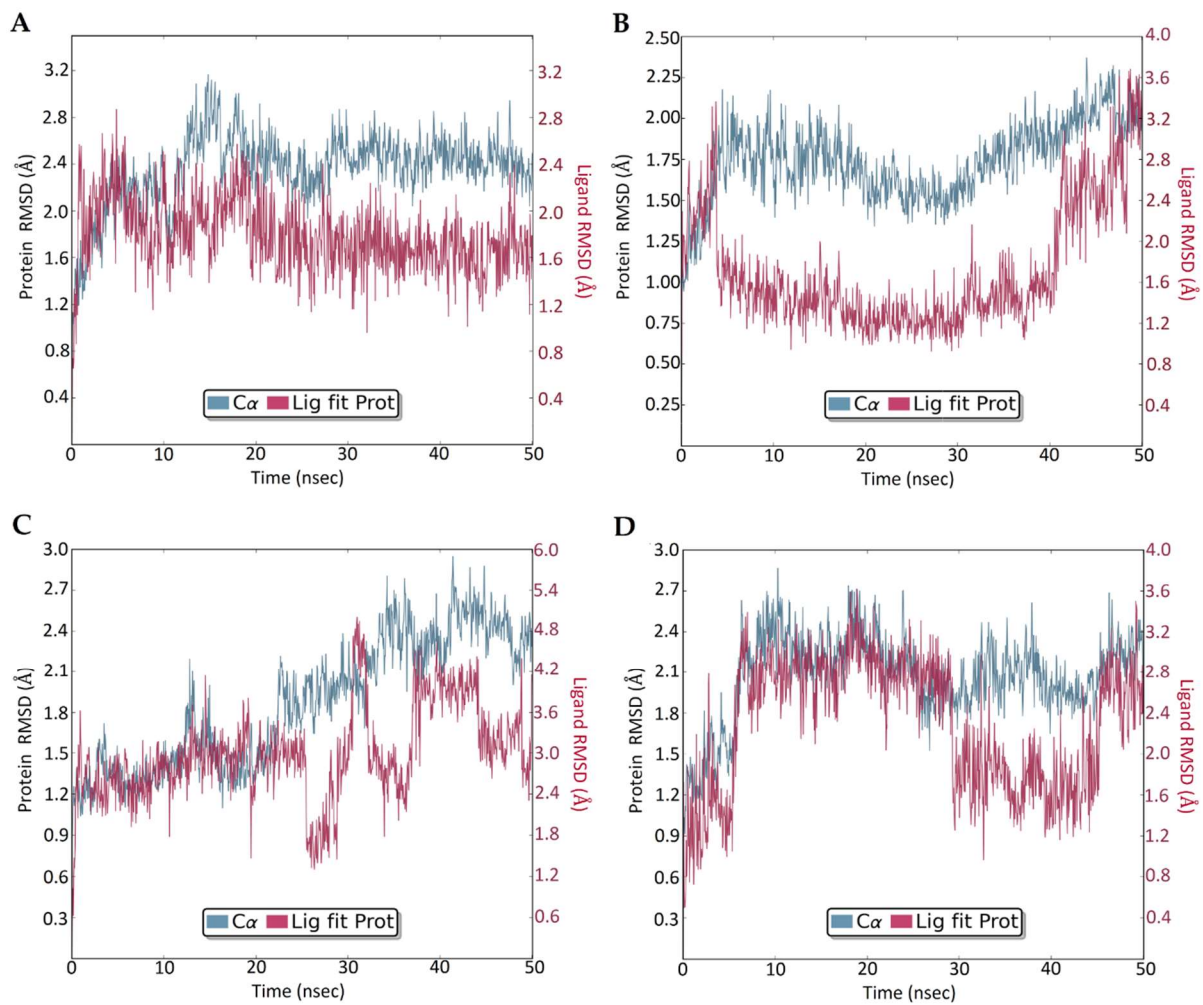

**Figure S3.** RMSD of the atomic positions for the compounds PF-06447475 (A), 1L (B), 2L (C) and 3L (D) (in red) and the receptor LRRK2 (in blue) of the 50 ns molecular dynamics simulations using Desmond code.

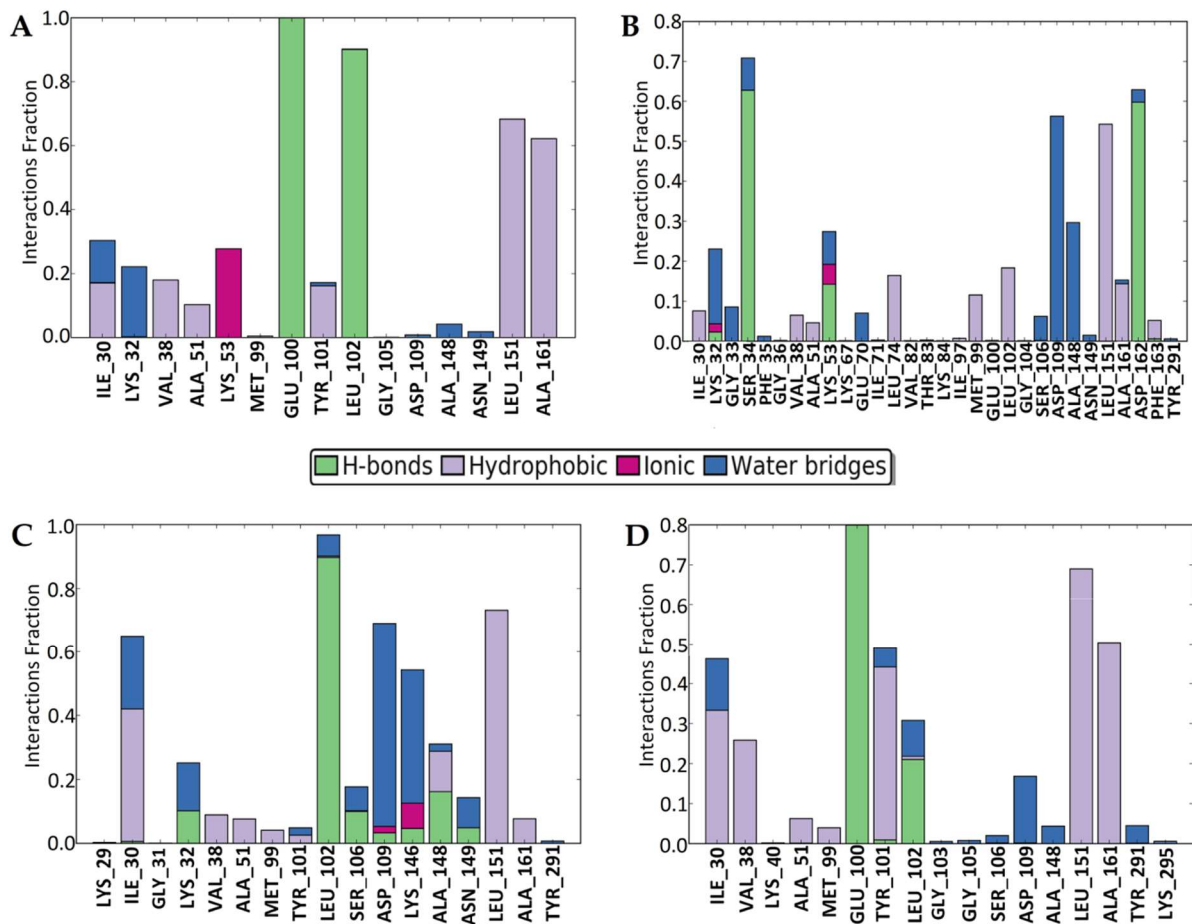

**Figure S4.** Molecular dynamics calculated contacts between compounds PF-06447475 (A), 1L (B), 2L (C), 3L (D) and LRRK2.

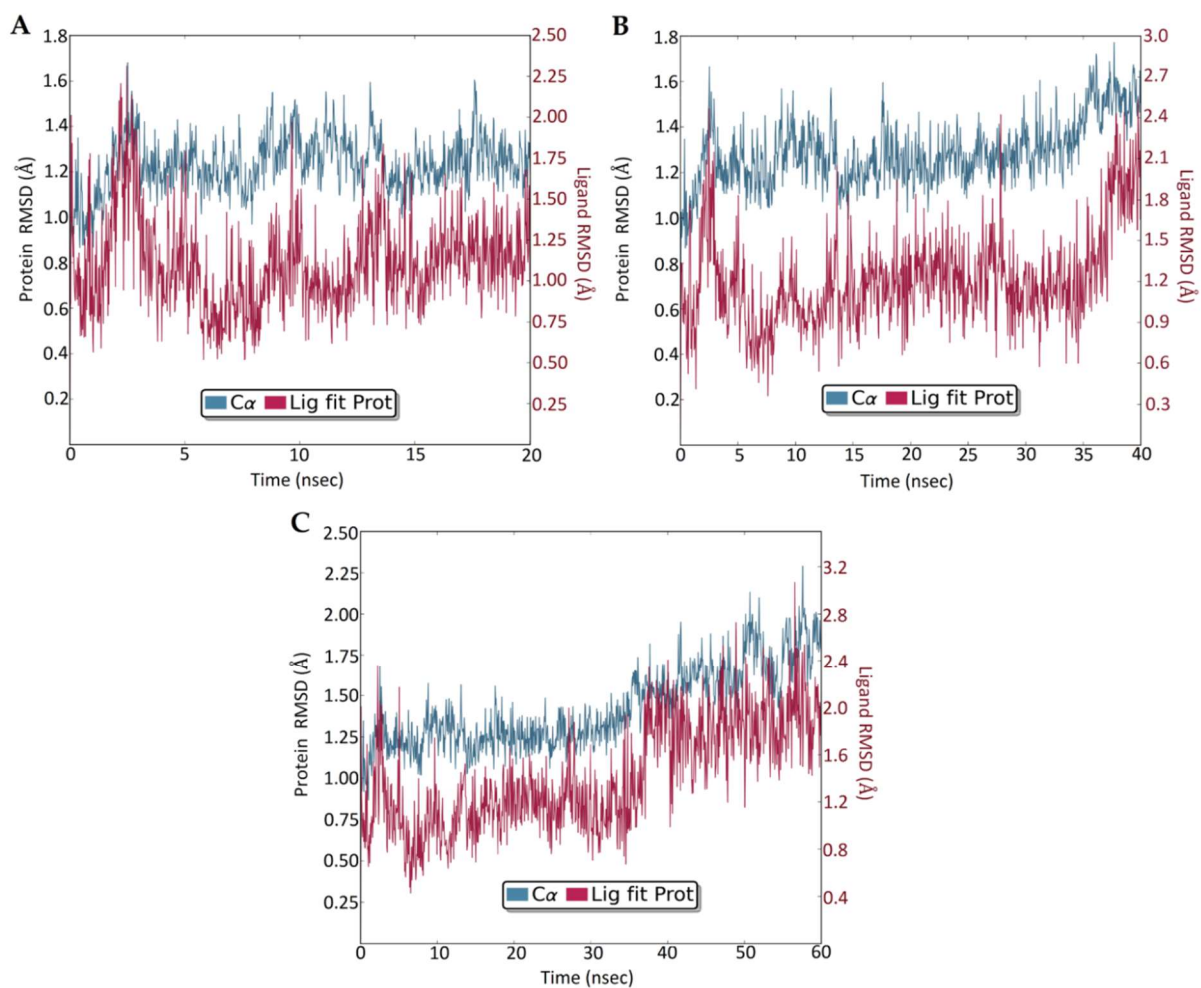

**Figure S5.** RMSD of the atomic positions for the compounds **1L** (in red) and the receptor LRRK2 (in blue) of the 20 ns (A), 40 ns (B) and 60 ns (C) molecular dynamics simulations using Desmond code.



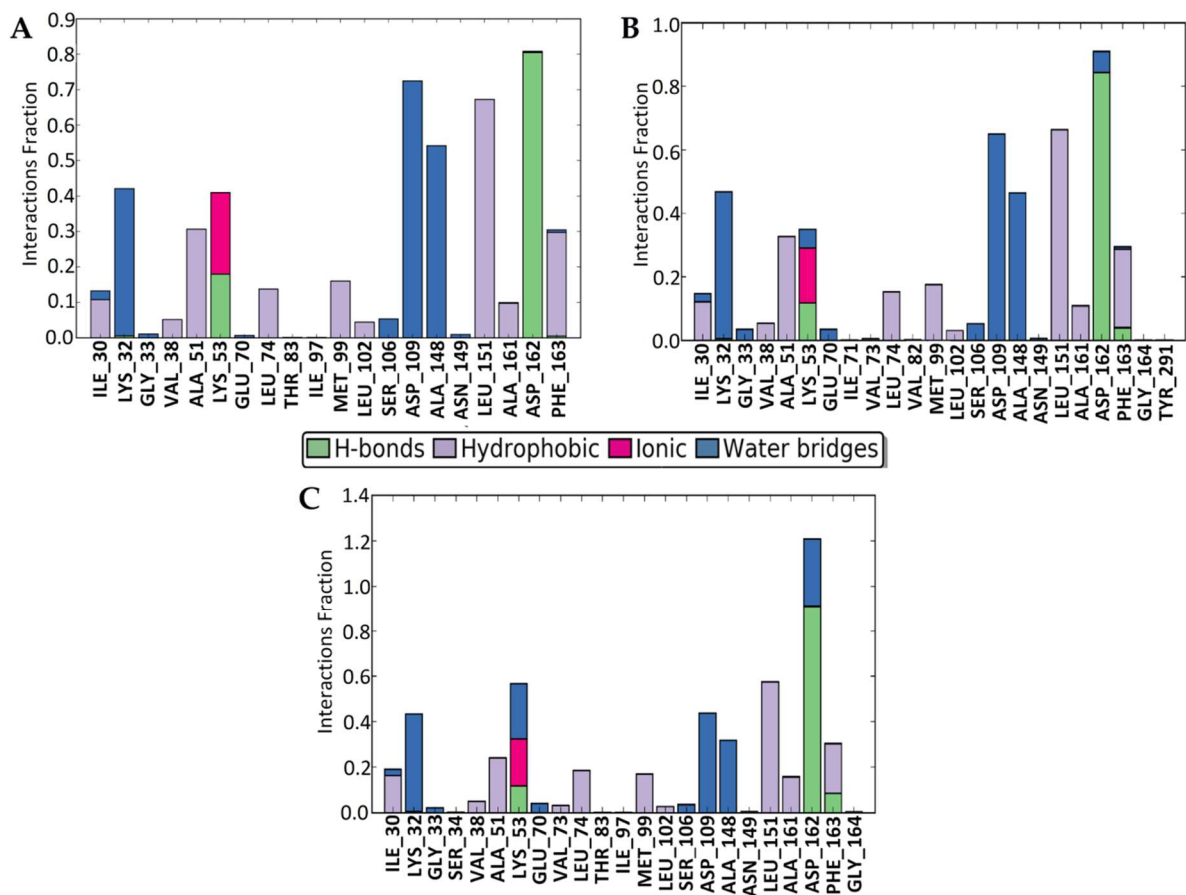

**Figure S6.** Molecular dynamics calculated contacts between compound **1L** and LRRK2 (**A**) – 20 ns, (**B**) – 40 ns, (**C**) – 60 ns.

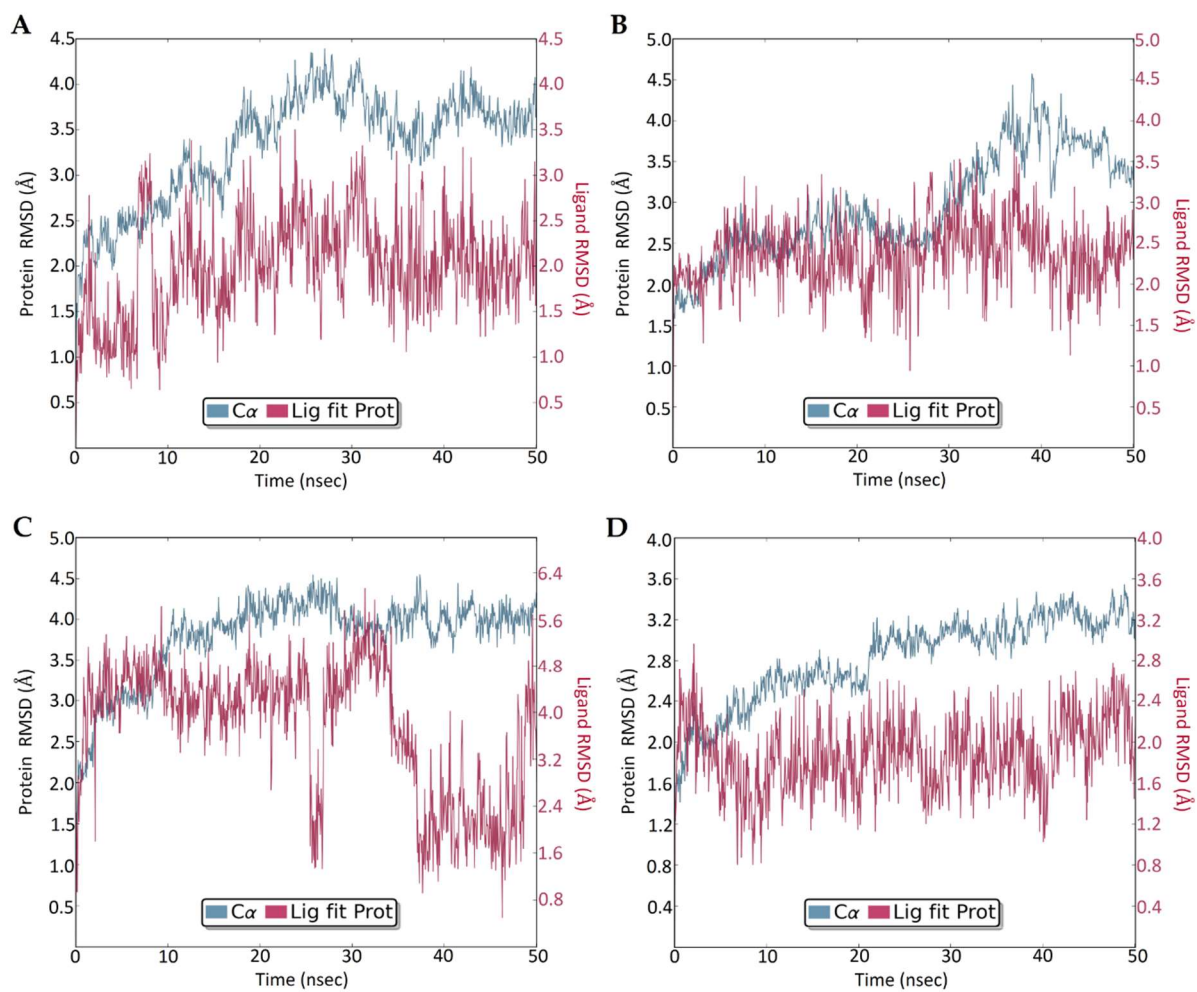

**Figure S7.** RMSD of the atomic positions for the compounds AZ-23 (A), 1T (B), 2T (C) and 3T (D) (in red) and the receptor TrkA (in blue) of the 50 ns molecular dynamics simulations using Desmond code.

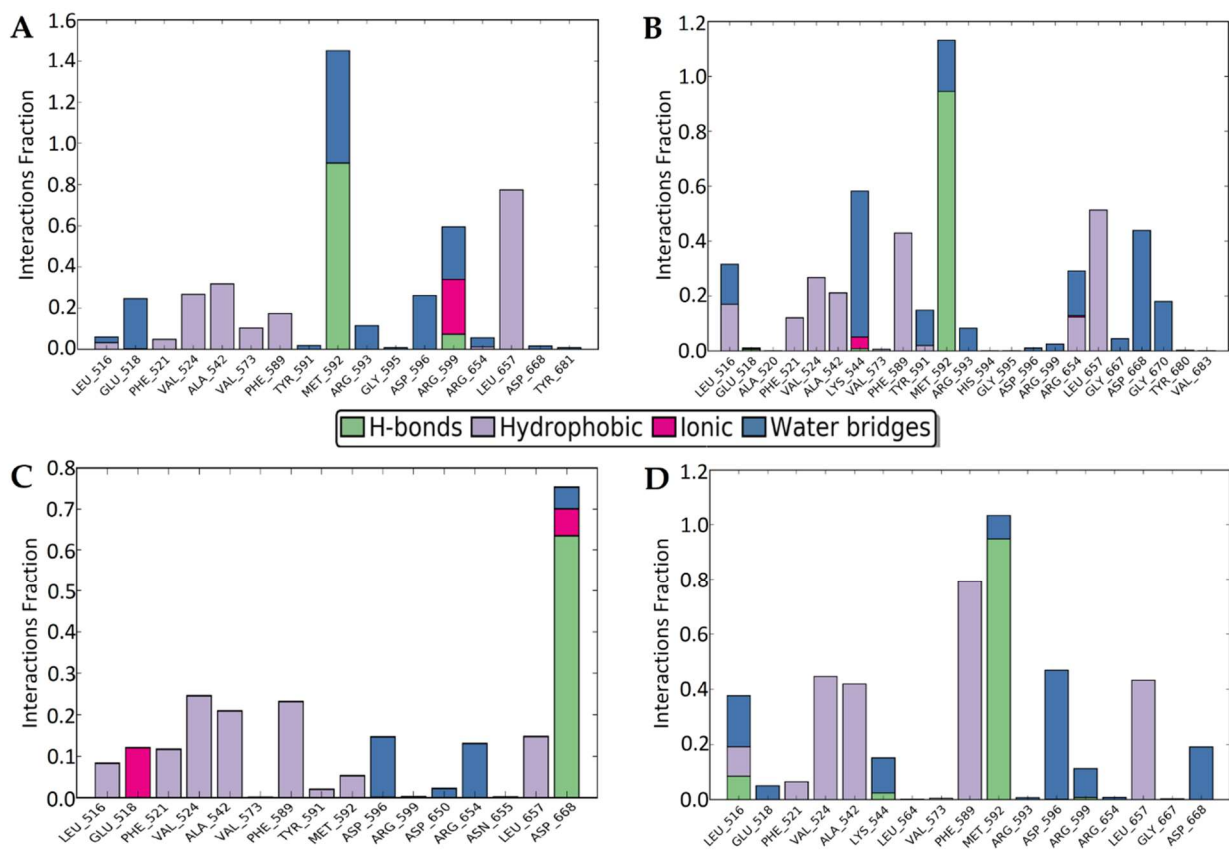

**Figure S8.** Molecular dynamics calculated contacts between compounds AZ-23 (A), 1T (B), 2T (C), 3T (D) and TrkA.
